# Supplementary material for: Embodiment Is Related to Better Performance on a Brain–Computer Interface in Immersive Virtual Reality: A Pilot Study
Source: PubMed Central journal article supplement (PMC7070491; doi:10.3390/s20041204), 2020-02-22
Supplement: sensors-20-01204-s001.pdf [file sensors-20-01204-s001.pdf]

**Table S1.** Mean, SD, and skewness for all variables.

| -                                  | Screen Condition |        |          | HMD-VR Condition |        |          |
|------------------------------------|------------------|--------|----------|------------------|--------|----------|
|                                    | Mean             | SD     | Skewness | Mean             | SD     | Skewness |
| Neurofeedback performance          | 80.95%           | 9.1%   | -0.27    | 83.33%           | 14.9%  | -0.32    |
| Time to complete successful trials | 4.347 s          | 1.17 s | 0.26     | 3.996 s          | 2.41 s | 0.07     |
| PSD band (8-24 Hz)                 | -4.69            | 2.96   | -0.07    | -4.32            | 3.41   | -0.48    |
| Alpha band (8-12 Hz)               | -1.84            | 2.90   | 0.26     | -2.89            | 3.04   | -0.37    |
| Beta band (13-24 Hz)               | -5.88            | 3.08   | -0.19    | -4.92            | 3.63   | -0.46    |
| Nausea                             | 1.59             | 8.94   | 0.36     | 2.39             | 5.93   | -0.15    |
| Oculomotor                         | 9.48             | 12.15  | 0.96     | 9.45             | 9.76   | -0.22    |
| Disorientation                     | 4.64             | 17.13  | 2.39     | 3.48             | 8.65   | 2.22     |
| Realism                            | 30.00            | 6.35   | 0.41     | 33.00            | 6.40   | 1.07     |
| Possibility to Act                 | 18.17            | 3.70   | -0.57    | 19.92            | 4.19   | 0.21     |
| Quality of Interface               | 12.83            | 3.07   | 0.16     | 13.42            | 2.97   | -0.32    |
| Possibility to Examine             | 13.17            | 2.59   | 0.17     | 14.92            | 2.27   | 0.45     |
| Self-Evaluation of Performance     | 10.0             | 1.95   | 0.69     | 11.00            | 2.13   | -0.18    |
| Embodiment                         | 4.68             | 1.27   | 1.01     | 5.4              | 1.71   | 0.64     |
| Self Embodiment                    | 5.39             | 1.17   | -0.13    | 5.43             | 1.76   | 0.17     |
| Spatial Embodiment                 | 3.60             | 2.04   | 1.23     | 5.35             | 2.00   | 0.29     |

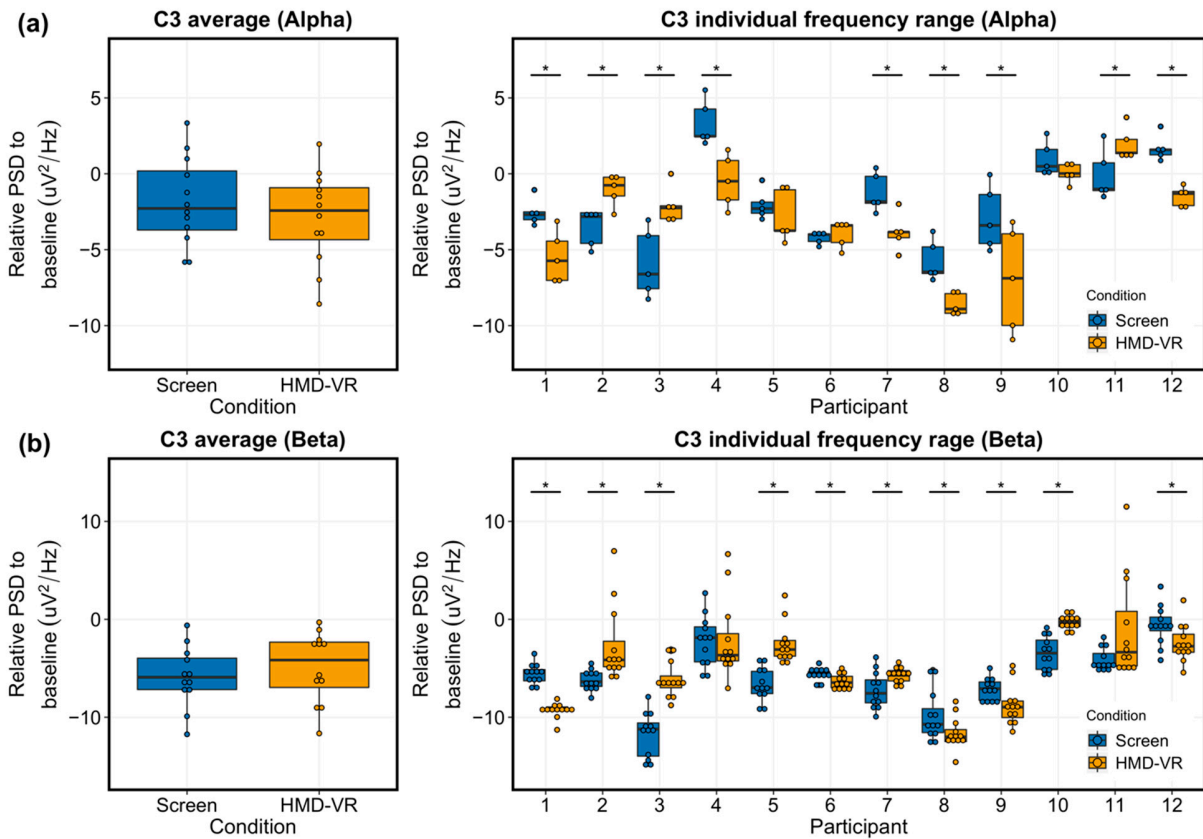

**Figure S1.** Individual participant EEG activity for C3. (a) Analysis of the relative PSD to baseline of C3 for the alpha band at the group-level (left) and at the individual-level (right). For individual subjects, for relative alpha levels during the task, there were significant differences between Screen and HMD-VR in nine participants. From those, three participants had significantly lower alpha (greater desynchronization) during the Screen condition and six participants had significantly lower alpha (greater desynchronization) during the HMD-VR condition. (b) Analysis of the relative PSD to baseline of C3 for the beta band at the group-level (left) and at the individual-level (right). For individual subjects, for relative beta levels during the task, there were significant differences between Screen and HMD-VR in ten participants. From those, five participants had significantly lower beta during the Screen condition and five participants had significantly lower beta during the HMD-VR condition.

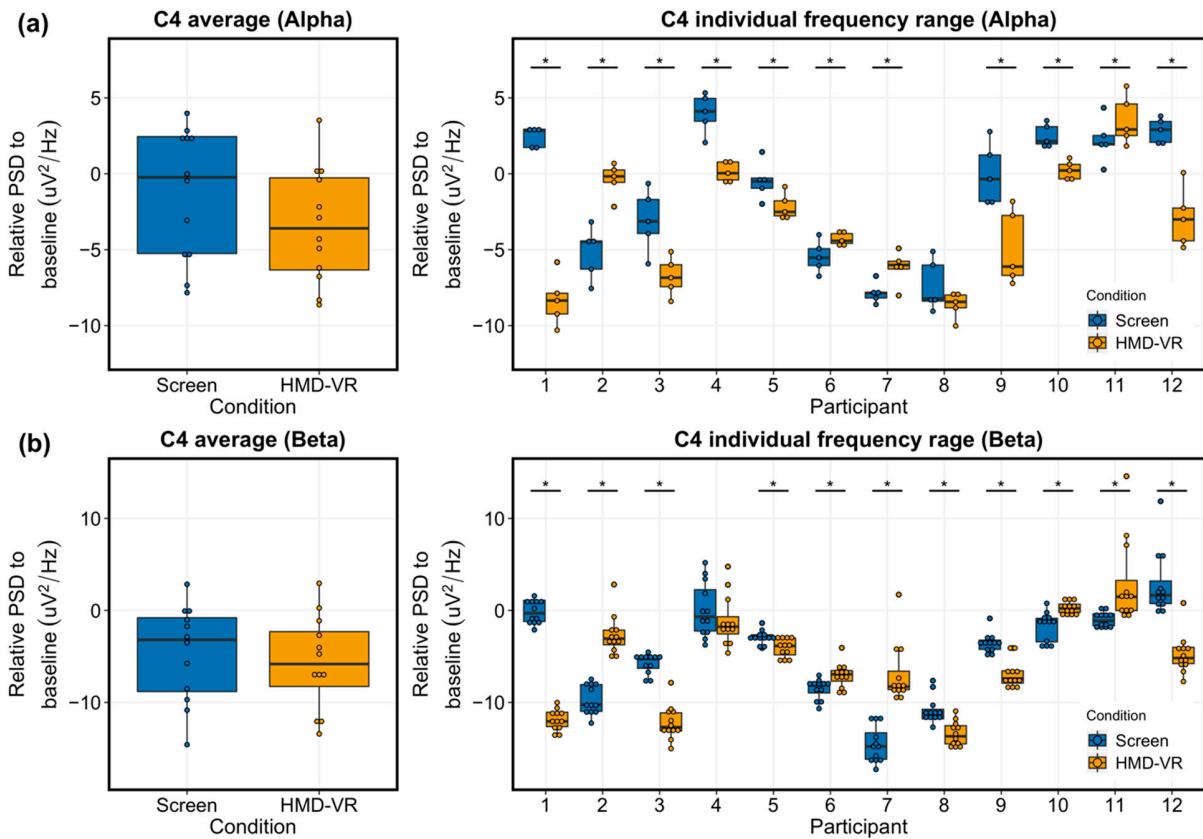

**Figure S2.** Individual participant EEG activity for C4. (a) Analysis of the relative PSD to baseline of C4 for the alpha band at the group-level (left) and at the individual-level (right). There were significant differences between Screen and HMD-VR in eleven participants. From those, four participants had significantly lower alpha during the Screen condition and seven participants had significantly lower alpha during the HMD-VR condition. (b) Analysis of the relative PSD to baseline of C4 for the beta band at the group-level (left) and at the individual-level (right). There were significant differences in the beta band between Screen and HMD-VR in eleven participants. From those, five participants had significantly lower beta during the Screen condition and six participants had significantly lower beta during the HMD-VR condition.
